# Supplementary material for: A new approach to understanding fluid mixing in process-study models of stratified fluids
Source: Copernicus journal article supplement (doi:10.5194/npg-31-61-2024), 2024-01-30
Supplement: Supplementary file 1 [file npg-31-61-2024-supplement.pdf]

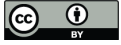

*Supplement of*

## **A new approach to understanding fluid mixing in process-study models of stratified fluids**

**Samuel George Hartharn-Evans et al.**

*Correspondence to:* Samuel George Hartharn-Evans ([sam.hartharn-evans@northumbria.ac.uk](mailto:sam.hartharn-evans@northumbria.ac.uk))

The copyright of individual parts of the supplement might differ from the article licence.

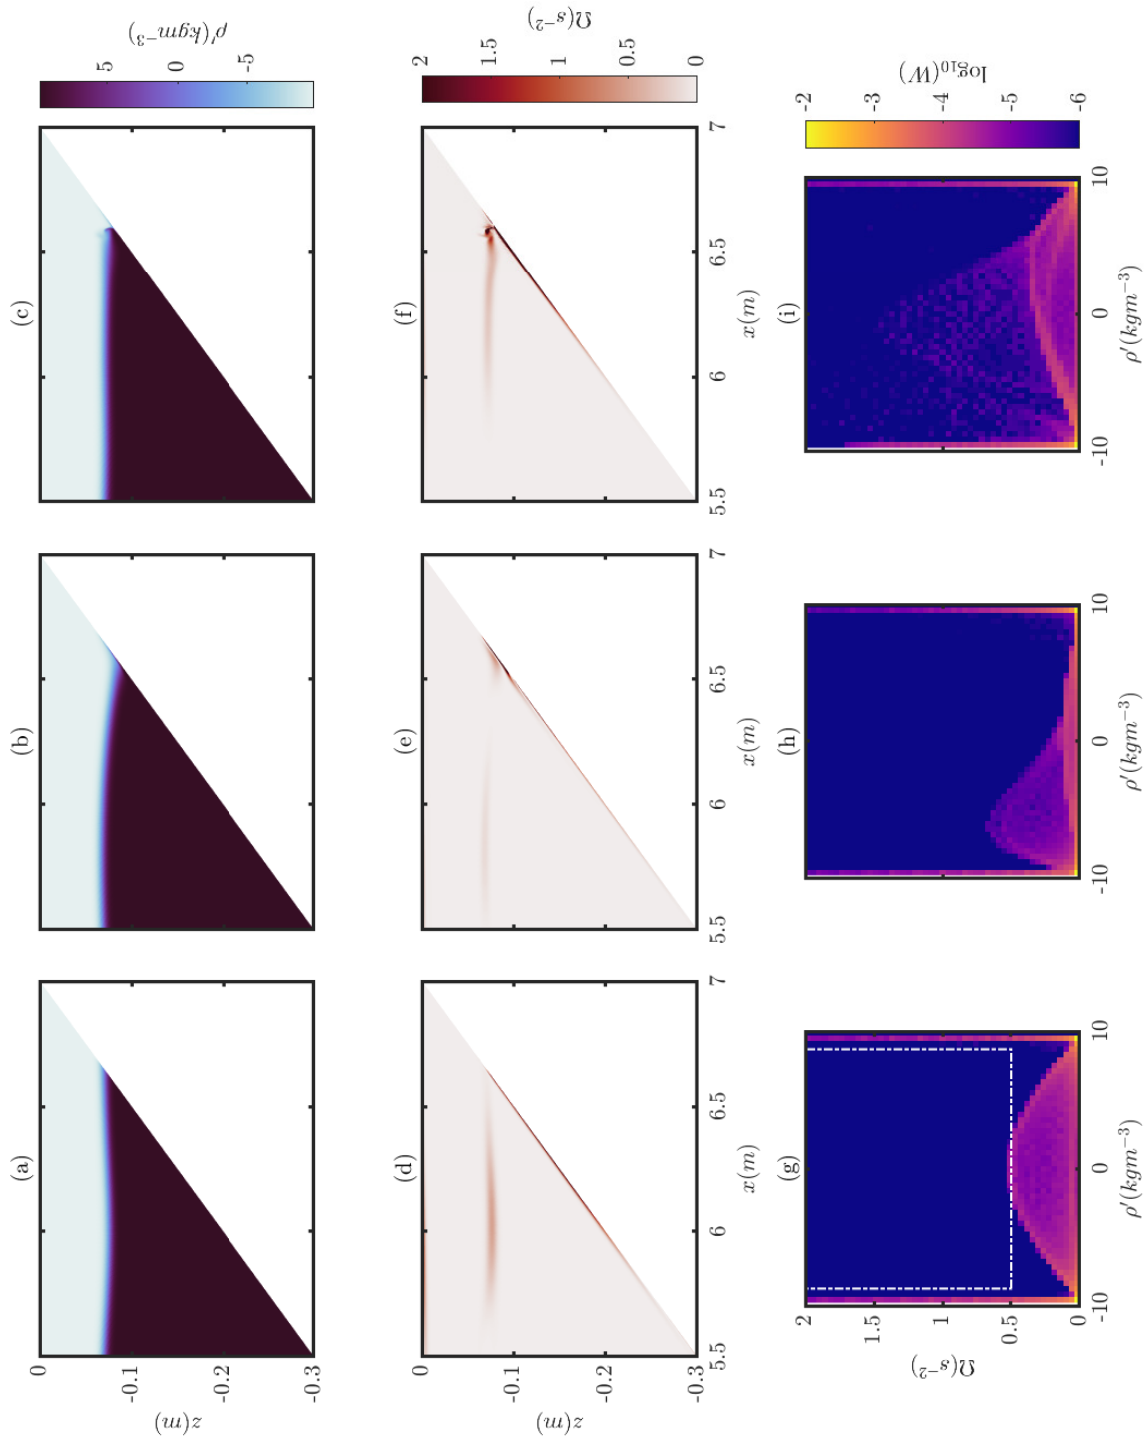

**Figure S1.** Time sequence of surging wave shoaling process shown as  $\rho'$  (top),  $\Omega$  (middle), and USP for the same variables (bottom).  $t = [62, 70, 75]$ s

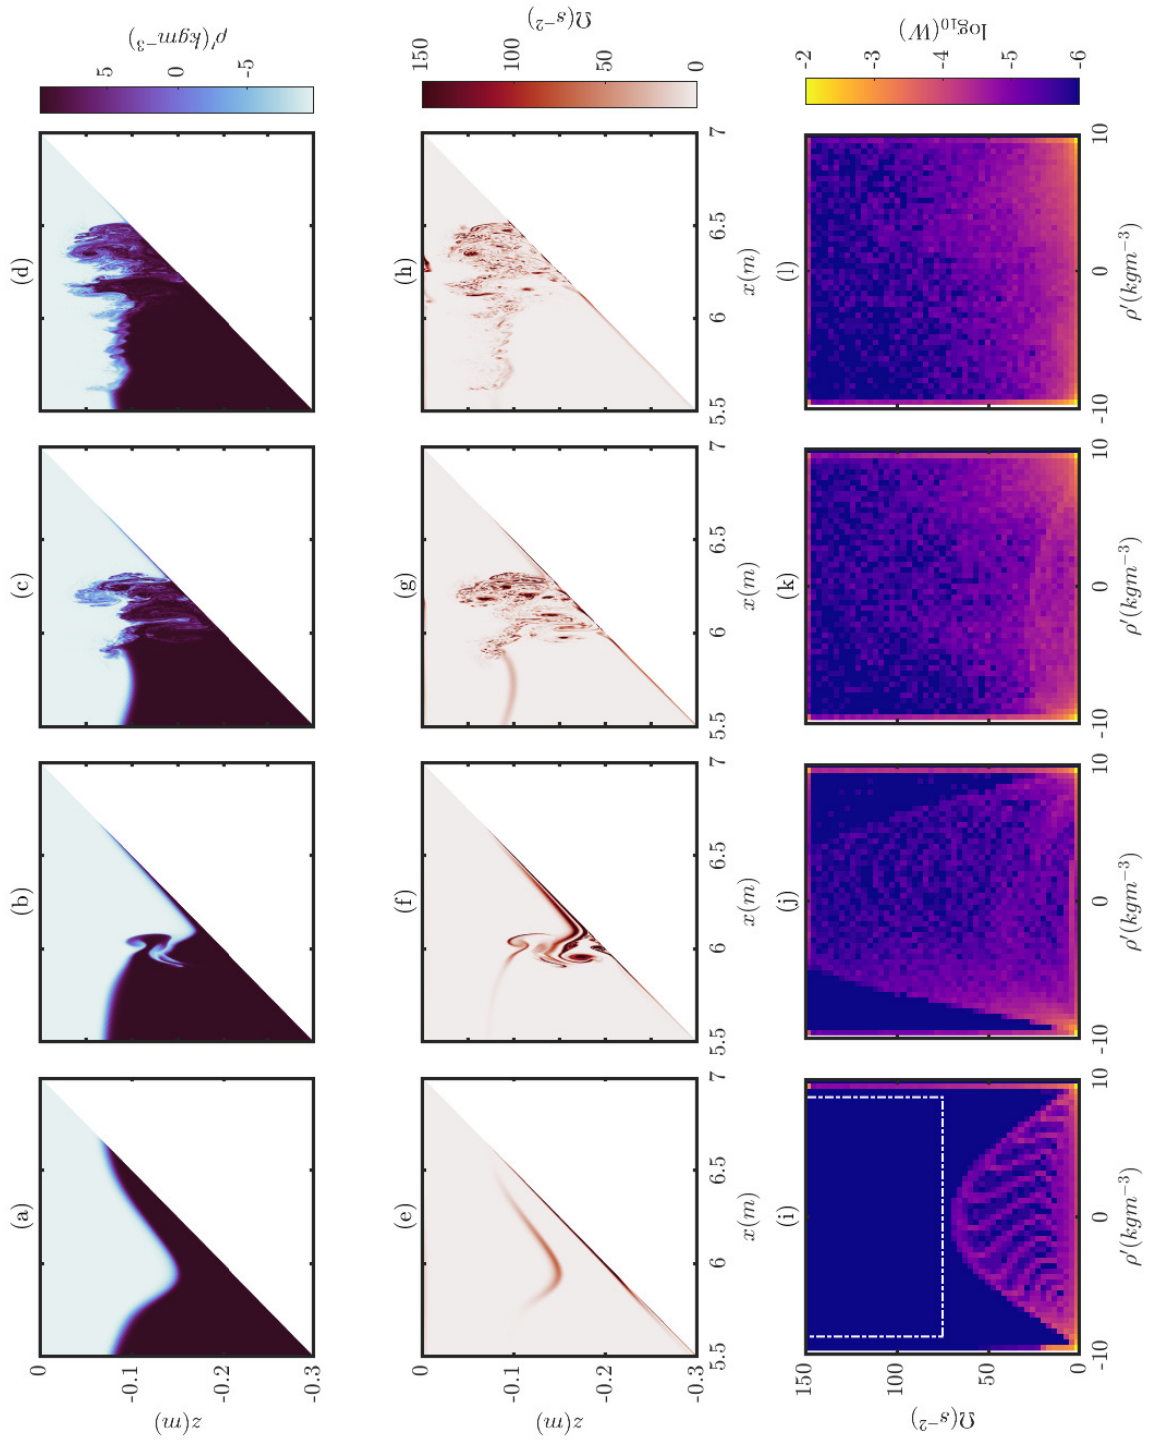

**Figure S2.** Time sequence of plunging wave shoaling process shown as  $\rho'$  (top),  $\Omega$  (middle), and USP for the same variables (bottom).  $t = [55, 60, 65, 70]$ s

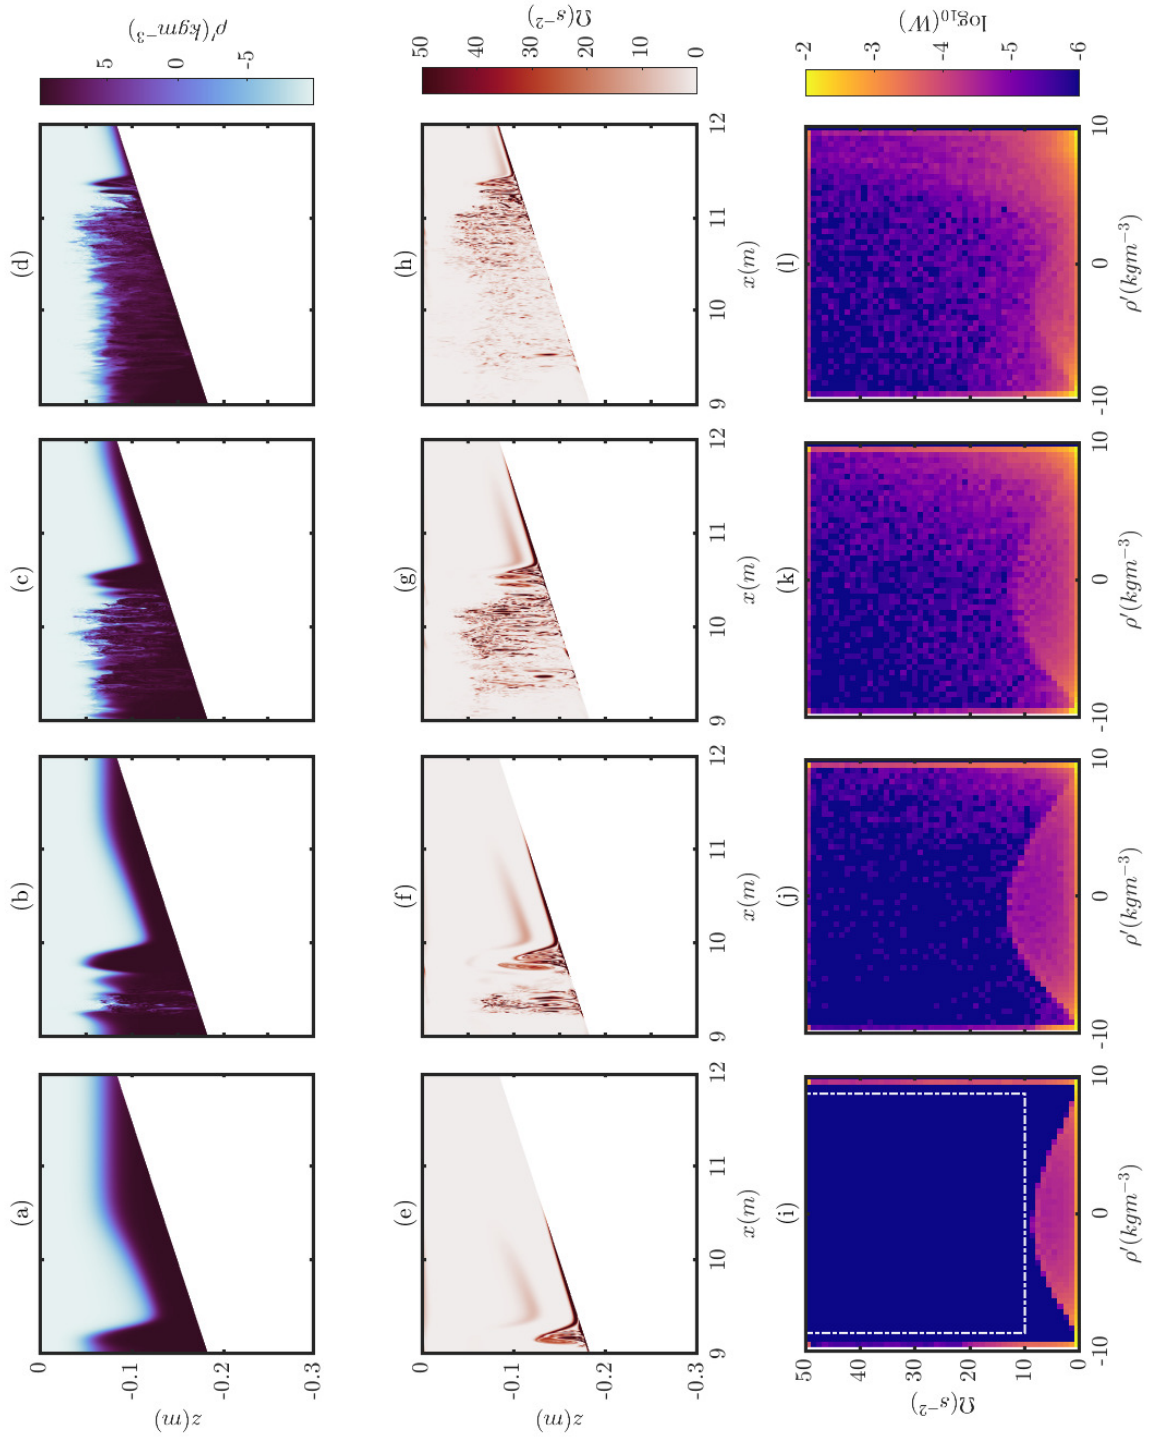

**Figure S3.** Time sequence of fissioning wave shoaling process shown as  $\rho'$  (top),  $\Omega$  (middle), and USP for the same variables (bottom).  $t = [100, 108, 120, 136]$ s
